# Supplementary material for: Impact of the Novel CoronaviruS (COVID-19) on Frontline PharmacIsts Roles and ServicEs: INSPIRE Worldwide Survey
Source: MDPI journal article supplement (doi:10.3390/pharmacy11020066), 2023-03-29
Supplement: s1 [file s1]

| Table S1. Descriptive analysis of INSPIRE worldwide by WHO Region (N = 505)                    |                                          |                |                              |                 |           |                        |                 |            |
|------------------------------------------------------------------------------------------------|------------------------------------------|----------------|------------------------------|-----------------|-----------|------------------------|-----------------|------------|
| Variable                                                                                       |                                          | African Region | Eastern Mediterranean Region | European Region | Missing   | Region of the Americas | Western Pacific | Total      |
|                                                                                                |                                          | N = 2          | N =79                        | N = 12          | N = 14    | N = 357                | N = 41          | N = 505    |
|                                                                                                |                                          |                |                              |                 |           |                        |                 |            |
|                                                                                                |                                          | N (%)          | N (%)                        | N (%)           | N (%)     | N (%)                  | N (%)           | N (%)      |
|                                                                                                |                                          |                |                              |                 |           |                        |                 |            |
| Addressing misinformation on COVID-19 treatments and vaccination to other healthcare providers |                                          |                |                              |                 | n =12     |                        |                 | n= 503     |
|                                                                                                | 1. Yes                                   | 1(50.00)       | 38(48.10)                    | 5(41.67)        | 8(66.67)  | 151(42.30)             | 21(51.22)       | 224(44.53) |
|                                                                                                | 2. No                                    | 0              | 26(32.91)                    | 5(41.67)        | 3(25.00)  | 159(44.54)             | 14(34.15)       | 207(41.15) |
|                                                                                                | 3. Not applicable to my practice setting | 1(50.00)       | 13(16.46)                    | 2(16.67)        | 0         | 47(13.17)              | 6(14.63)        | 69(13.72)  |
|                                                                                                | 4. Not applicable to my country          | 0              | 2(2.53)                      | 0               | 1(8.33)   | 0                      | 0               | 3(0.60)    |
|                                                                                                |                                          |                |                              |                 |           |                        |                 |            |
| Addressing misinformation on COVID-19 treatments and vaccination to patients                   |                                          |                |                              |                 | n = 11    |                        |                 | n= 502     |
|                                                                                                | 1. Yes                                   | 1(50.00)       | 52(65.82)                    | 9(75.00)        | 8(11)     | 291(81.51)             | 36(87.80)       | 397(79.08) |
|                                                                                                | 2. No                                    | 0              | 20(25.32)                    | 2(16.67)        | 3(27.27)  | 45(12.61)              | 4(9.76)         | 74(14.74)  |
|                                                                                                | 3. Not applicable to my practice setting | 0              | 7(8.86)                      | 1(8.33)         | 0         | 21(5.88)               | 1(2.44)         | 30(5.98)   |
|                                                                                                | 4. Not applicable to my country          | 1(50.00)       | 0                            | 0               | 0         | 0                      | 0               | 1(0.20)    |
|                                                                                                |                                          |                |                              |                 |           |                        |                 |            |
| Allaying patients fears and anxiety about COVID-19                                             |                                          |                |                              |                 | n =11     |                        |                 | n= 499     |
|                                                                                                | 1. Yes                                   | 1(50.00)       | 61(80.26)                    | 9(75.00)        | 8(72.73)  | 298(83.47)             | 36(87.80)       | 413(82.77) |
|                                                                                                | 2. No                                    | 0              | 12(15.79)                    | 1(8.33)         | 3(27.27)  | 45(12.61)              | 3(7.32)         | 64(12.83)  |
|                                                                                                | 3. Not applicable to my practice setting | 0              | 2(2.63)                      | 2(16.67)        | 0         | 14(3.92)               | 2(4.88)         | 20(4.01)   |
|                                                                                                | 4. Not applicable to my country          | 1(50.00)       | 1(1.32)                      | 0               | 0         | 0                      | 0               | 2(0.40)    |
|                                                                                                |                                          |                |                              |                 |           |                        |                 |            |
| Administering the COVID-19 vaccine                                                             |                                          |                |                              |                 | n =11     | n = 356                |                 | n= 501     |
|                                                                                                | 1. Yes                                   | 0              | 26(32.91)                    | 3(25.00)        | 9(81.82)  | 183(51.40)             | 4(9.76)         | 225(44.91) |
|                                                                                                | 2. No                                    | 0              | 39(49.37)                    | 4(33.33)        | 2(18.18)  | 126(35.39)             | 26(63.41)       | 197(39.32) |
|                                                                                                | 3. Not applicable to my practice setting | 0              | 9(11.39)                     | 4(33.33)        | 0         | 47(13.20)              | 6(14.63)        | 66(13.17)  |
|                                                                                                | 4. Not applicable to my country          | 2(100.00)      | 5(6.33)                      | 1(8.33)         | 0         | 0                      | 5(12.20)        | 13(2.59)   |
|                                                                                                |                                          |                |                              |                 |           |                        |                 |            |
| Educating the public on reducing the spread of COVID-19                                        |                                          |                |                              |                 | n =12     |                        |                 | n = 503    |
|                                                                                                | 1. Yes                                   | 2(100.00)      | 70(88.61)                    | 9(75.00)        | 11(91.67) | 280(78.43)             | 37(90.24)       | 409(81.31) |
|                                                                                                | 2. No                                    | 0              | 6(7.59)                      | 0               | 1(8.33)   | 58(16.25)              | 1(2.44)         | 66(13.12)  |
|                                                                                                | 3. Not applicable to my practice setting | 0              | 2(2.53)                      | 3(25.00)        | 0         | 19(5.32)               | 3(7.32)         | 27(5.37)   |
|                                                                                                | 4. Not applicable to my country          | 0              | 1(1.27)                      | 0               | 0         | 0                      | 0               | 1(0.20)    |
|                                                                                                |                                          |                |                              |                 |           |                        |                 |            |
| Participating on COVID-19 taskforce                                                            |                                          |                | n =78                        |                 | n =10     | n = 355                |                 | n = 498    |
|                                                                                                | 1. Yes                                   | 0              | 30(38.46)                    | 3(24.00)        | 6(60.00)  | 74(20.85)              | 14(34.15)       | 127(25.50) |
|                                                                                                | 2. No                                    | 2(100.00)      | 35(44.87)                    | 8(66.67)        | 4(40.00)  | 235(66.20)             | 15(36.59)       | 299(60.04) |
|                                                                                                | 3. Not applicable to my practice setting | 0              | 11(14.1)                     | 1(8.33)         | 0         | 46(12.96)              | 11(26.83)       | 69(13.86)  |
|                                                                                                | 4. Not applicable to my country          | 0              | 2(2.56)                      | 0               | 0         | 0                      | 1(2.44)         | 3(0.60)    |
|                                                                                                |                                          |                |                              |                 |           |                        |                 |            |
| Contributing to/establishing a field hospital for COVID-19                                     |                                          |                | n = 78                       |                 | n = 11    | n =355                 |                 | n=499      |
|                                                                                                | 1. Yes                                   | 0              | 17(21.79)                    | 2(16.67)        | 4(36.36)  | 29(8.17)               | 3(7.32)         | 55(11.02)  |
|                                                                                                | 2. No                                    | 0              | 49(62.82)                    | 9(75.00)        | 6(54.55)  | 234(65.92)             | 22(53.66)       | 320(64.13) |
|                                                                                                | 3. Not applicable to my practice setting | 0              | 12(15.38)                    | 1(8.33)         | 1(9.09)   | 91(25.63)              | 12(29.27)       | 117(23.45) |
|                                                                                                | 4. Not applicable to my country          | 2(100.00)      | 0                            | 0               | 0         | 1(0.28)                | 4(9.76)         | 7(1.40)    |

|                                                                        |                                          |           |           |            |          |            |           |            |
|------------------------------------------------------------------------|------------------------------------------|-----------|-----------|------------|----------|------------|-----------|------------|
| Working in a field hospital for COVID-19                               |                                          |           |           |            | n =11    | n =355     |           | n=500      |
|                                                                        | 1. Yes                                   | 0         | 11(13.92) | 1(8.33)    | 4(36.36) | 8(2.25)    | 4(9.76)   | 28(5.60)   |
|                                                                        | 2. No                                    | 2(100.00) | 54(68.35) | 10(83.33)  | 5(45.45) | 251(70.70) | 23(56.10) | 345(69.00) |
|                                                                        | 3. Not applicable to my practice setting | 0         | 13(16.46) | 1(8.33)    | 2(18.18) | 94(26.48)  | 9(21.95)  | 119(23.80) |
|                                                                        | 4. Not applicable to my country          | 0         | 1(1.27)   | 0          | 0        | 2(0.56)    | 5(12.20)  | 8(1.60)    |
| Providing PPE supplies to patients (e.g., face masks)                  |                                          |           | n =77     |            | n =12    | n =356     |           | n= 500     |
|                                                                        | 1. Yes                                   | 2(100.00) | 50(64.94) | 5(41.67)   | 9(75.00) | 159(44.66) | 33(80.49) | 258(51.60) |
|                                                                        | 2. No                                    | 0         | 20(25.97) | 6(50.00)   | 3(25.00) | 158(44.38) | 5(12.20)  | 192(38.40) |
|                                                                        | 3. Not applicable to my practice setting | 0         | 6(7.79)   | 1(8.33)    | 0        | 39(10.96)  | 3(7.32)   | 49(9.80)   |
|                                                                        | 4. Not applicable to my country          | 0         | 1(1.3)    | 0          | 0        | 0          | 0         | 1(0.20)    |
| Guiding policy development on COVID-19                                 |                                          | n = 2     | n =79     | n = 12     | n =11    | n = 355    | n = 41    | n=500      |
|                                                                        | 1. Yes                                   | 0         | 34(43.04) | 3(25.00)   | 6(54.55) | 87(24.51)  | 9(21.95)  | 139(27.80) |
|                                                                        | 2. No                                    | 1(50.00)  | 33(41.77) | 8(66.67)   | 4(36.36) | 220(61.97) | 18(43.90) | 284(56.80) |
|                                                                        | 3. Not applicable to my practice setting | 0         | 9(11.39)  | 1(8.33)    | 1(9.09)  | 48(13.52)  | 14(34.15) | 73(14.60)  |
|                                                                        | 4. Not applicable to my country          | 1(50.00)  | 3(3.8)    | 0          | 0        | 0          | 0         | 4(0.80)    |
| Coordinating clinical trial management specific to COVID-19 treatments |                                          |           |           | n = 11     | n =11    | n =355     |           | n=499      |
|                                                                        | 1. Yes                                   | 0         | 18(22.78) | 0          | 4(36.36) | 26(7.32)   | 3(7.32)   | 51(10.22)  |
|                                                                        | 2. No                                    | 0         | 50(63.29) | 11(100.00) | 6(54.55) | 244(68.73) | 23(56.10) | 334(66.93) |
|                                                                        | 3. Not applicable to my practice setting | 0         | 7(8.86)   | 0          | 1(9.09)  | 85(23.94)  | 14(34.15) | 107(21.44) |
|                                                                        | 4. Not applicable to my country          | 2(100.00) | 4(5.06)   | 0          | 0        | 0          | 1(2.44)   | 7(1.40)    |
| Advocating for COVID-19 public health messaging                        |                                          |           | n =78     |            | n =11    | n =355     |           | n= 499     |
|                                                                        | 1. Yes                                   | 0         | 38(48.72) | 3(25.00)   | 8(72.73) | 67(18.87)  | 11(26.83) | 127(25.45) |
|                                                                        | 2. No                                    | 1(50.00)  | 32(41.03) | 8(66.67)   | 3(27.27) | 229(64.51) | 17(41.46) | 290(58.12) |
|                                                                        | 3. Not applicable to my practice setting | 0         | 7(8.97)   | 1(8.33)    | 0        | 59(16.62)  | 12(29.27) | 79(15.83)  |
|                                                                        | 4. Not applicable to my country          | 1(50.00)  | 1(1.28)   | 0          | 0        | 0          | 1(2.44)   | 3(0.60)    |
| Reporting domestic violence                                            |                                          |           |           |            | n =11    | n = 355    | n = 40    | n= 499     |
|                                                                        | 1. Yes                                   | 0         | 17(21.52) | 1(8.33)    | 3(27.27) | 20(5.63)   | 2(5.00)   | 43(8.62)   |
|                                                                        | 2. No                                    | 1(50.00)  | 48(60.76) | 10(83.33)  | 8(72.73) | 279(78.59) | 32(80.00) | 378(75.75) |
|                                                                        | 3. Not applicable to my practice setting | 0         | 11(13.92) | 1(8.33)    | 0        | 55(15.49)  | 5(12.50)  | 72(14.43)  |
|                                                                        | 4. Not applicable to my country          | 1(50.00)  | 3(3.8)    | 0          | 0        | 1(0.28)    | 1(2.50)   | 6(1.20)    |
| Providing drive-thru pharmacy services                                 |                                          |           |           |            | n =11    | n =354     |           | n= 499     |
|                                                                        | 1. Yes                                   | 1(50.00)  | 28(35.44) | 1(8.33)    | 7(63.64) | 79(22.32)  | 6(14.63)  | 122(24.45) |
|                                                                        | 2. No                                    | 1(50.00)  | 37(46.84) | 9(75.00)   | 4(36.36) | 187(52.82) | 21(51.22) | 259(51.90) |
|                                                                        | 3. Not applicable to my practice setting | 0         | 10(12.66) | 2(16.67)   | 0        | 85(24.01)  | 10(24.39) | 107(21.44) |
|                                                                        | 4. Not applicable to my country          | 0         | 4(5.06)   | 0          | 0        | 3(0.85)    | 4(9.76)   | 11(2.20)   |
| Providing Psychological First Aid                                      |                                          |           |           |            | n =11    | n =355     |           | n= 500     |
|                                                                        | 1. Yes                                   | 1(50.00)  | 30(37.97) | 1(8.33)    | 5(45.45) | 61(17.18)  | 8(19.51)  | 106(21.20) |
|                                                                        | 2. No                                    | 0         | 40(50.63) | 8(66.67)   | 6(54.55) | 237(66.76) | 24(58.54) | 315(63.00) |
|                                                                        | 3. Not applicable to my practice setting | 0         | 7(8.86)   | 3(25.00)   | 0        | 55(15.49)  | 7(17.07)  | 72(14.40)  |
|                                                                        | 4. Not applicable to my country          | 1(50.00)  | 2(2.53)   | 0          | 0        | 2(0.56)    | 2(4.88)   | 7(1.40)    |

|                                                |                                          |           |           |          |          |            |           |            |
|------------------------------------------------|------------------------------------------|-----------|-----------|----------|----------|------------|-----------|------------|
|                                                |                                          |           |           |          | n =12    | n =355     |           | n= 501     |
| Providing telehealth or tele-pharmacy consults | 1. Yes                                   | 0         | 43(54.43) | 5(41.67) | 7(58.33) | 159(44.79) | 12(29.27) | 226(45.11) |
|                                                | 2. No                                    | 0         | 26(32.91) | 5(41.67) | 5(41.67) | 150(42.25) | 15(36.59) | 201(40.12) |
|                                                | 3. Not applicable to my practice setting | 0         | 6(7.59)   | 2(16.67) | 0        | 46(12.96)  | 12(29.27) | 66(13.17)  |
|                                                | 4. Not applicable to my country          | 2(100.00) | 4(5.06)   | 0        | 0        | 0          | 2(4.88)   | 8(1.60)    |
|                                                |                                          |           |           |          |          |            |           |            |
| Compounding hand sanitizers                    | 1. Yes                                   | 2(100.00) | 38(48.10) | 5(41.67) | 2(18.18) | 26(7.32)   | 11(26.83) | 84(16.80)  |
|                                                | 2. No                                    | 0         | 28(35.44) | 4(33.33) | 9(81.82) | 255(71.83) | 22(53.66) | 318(63.60) |
|                                                | 3. Not applicable to my practice setting | 0         | 10(12.66) | 3(25.00) | 0        | 73(20.56)  | 7(17.07)  | 93(18.60)  |
|                                                | 4. Not applicable to my country          | 0         | 3(3.8)    | 0        | 0        | 1(0.28)    | 1(2.44)   | 5(1.00)    |
|                                                |                                          |           |           |          |          |            |           |            |
| Rationing medicine supplies                    | 1. Yes                                   | 1(50.00)  | 53(67.95) | 8(66.67) | 7(63.64) | 239(66.95) | 33(80.49) | 341(68.06) |
|                                                | 2. No                                    | 0         | 15(19.23) | 3(25.00) | 4(36.36) | 80(22.41)  | 5(12.20)  | 107(21.36) |
|                                                | 3. Not applicable to my practice setting | 0         | 9(11.54)  | 1(8.33)  | 0        | 38(10.64)  | 3(7.32)   | 51(10.18)  |
|                                                | 4. Not applicable to my country          | 1(50.00)  | 1(1.28)   | 0        | 0        | 0          | 0         | 2(0.40)    |
|                                                |                                          |           |           |          |          |            |           |            |
| Delivering medications to patients at home     | 1. Yes                                   | 0         | 43(54.43) | 5(41.67) | 9(81.82) | 186(52.25) | 29(70.73) | 272(54.29) |
|                                                | 2. No                                    | 1(50.00)  | 23(29.11) | 4(33.33) | 2(18.18) | 93(26.12)  | 5(12.20)  | 128(25.55) |
|                                                | 3. Not applicable to my practice setting | 0         | 11(13.92) | 3(25.00) | 0        | 77(21.63)  | 6(14.63)  | 97(19.36)  |
|                                                | 4. Not applicable to my country          | 1(50.00)  | 2(2.53)   | 0        | 0        | 0          | 1(2.44)   | 4(0.80)    |
|                                                |                                          |           |           |          |          |            |           |            |
| Renewing/Extending prescriptions               | 1. Yes                                   | 0         | 50(63.29) | 7(58.33) | 9(75.00) | 207(58.15) | 20(48.78) | 293(58.37) |
|                                                | 2. No                                    | 1(50.00)  | 19(24.05) | 1(8.33)  | 3(25.00) | 73(20.51)  | 11(26.83) | 108(21.51) |
|                                                | 3. Not applicable to my practice setting | 0         | 10(12.66) | 3(25.00) | 0        | 75(21.07)  | 5(12.20)  | 93(18.53)  |
|                                                | 4. Not applicable to my country          | 1(50.00)  | 0         | 1(8.33)  | 0        | 1(0.28)    | 5(12.20)  | 8(1.59)    |
|                                                |                                          |           |           |          |          |            |           |            |
| Prescribing emergency supply refills           | 1. Yes                                   | 2(100.00) | 42(53.16) | 5(41.67) | 6(54.55) | 173(48.60) | 27(65.85) | 255(50.90) |
|                                                | 2. No                                    | 0         | 23(29.11) | 1(8.33)  | 5(45.45) | 95(26.69)  | 6(14.63)  | 130(25.95) |
|                                                | 3. Not applicable to my practice setting | 0         | 13(16.46) | 5(41.67) | 0        | 86(24.16)  | 6(14.63)  | 110(21.96) |
|                                                | 4. Not applicable to my country          | 0         | 1(1.27)   | 1(8.33)  | 0        | 2(0.56)    | 2(4.88)   | 6(1.20)    |
|                                                |                                          |           |           |          |          |            |           |            |
| Administering influenza and other vaccines     | 1. Yes                                   | 0         | 36(45.57) | 4(33.33) | 8(72.73) | 216(60.50) | 14(34.15) | 278(55.38) |
|                                                | 2. No                                    | 0         | 29(36.71) | 2(16.67) | 3(27.27) | 93(26.05)  | 16(39.02) | 143(28.49) |
|                                                | 3. Not applicable to my practice setting | 0         | 11(13.92) | 4(33.33) | 0        | 48(13.45)  | 5(12.20)  | 68(13.55)  |
|                                                | 4. Not applicable to my country          | 2(100.00) | 3(3.8)    | 2(16.67) | 0        | 0          | 6(14.63)  | 13(2.59)   |
|                                                |                                          |           |           |          |          |            |           |            |
| Treating ambulatory conditions                 | 1. Yes                                   | 1(50.00)  | 58(73.42) | 5(41.67) | 9(81.82) | 231(64.89) | 26(63.41) | 330(65.87) |
|                                                | 2. No                                    | 1(50.00)  | 12(15.19) | 3(25.00) | 2(18.18) | 65(18.26)  | 9(21.95)  | 92(18.36)  |
|                                                | 3. Not applicable to my practice setting | 0         | 9(11.39)  | 4(33.33) | 0        | 60(16.85)  | 5(12.2)   | 78(15.57)  |
|                                                | 4. Not applicable to my country          | 0         | 0         | 0        | 0        | 0          | 1(2.44)   | 1(0.20)    |
|                                                |                                          |           |           |          |          |            |           |            |

|                                                       |                                          |           |           |          |           |            |           |            |
|-------------------------------------------------------|------------------------------------------|-----------|-----------|----------|-----------|------------|-----------|------------|
| Managing and/or monitoring patients' chronic diseases |                                          |           |           | n = 11   | n = 12    | n =356     |           | n= 501     |
|                                                       | 1. Yes                                   | 1(50.00)  | 53(67.09) | 6(54.55) | 7(58.33)  | 267(75.00) | 28(68.29) | 362(72.26) |
|                                                       | 2. No                                    | 1(50.00)  | 15(18.99) | 2(18.18) | 5(41.67)  | 50(14.04)  | 8(19.51)  | 81(16.17)  |
|                                                       | 3. Not applicable to my practice setting | 0         | 11(13.92) | 3(27.27) | 0         | 39(10.96)  | 5(12.20)  | 58(11.58)  |
|                                                       | 4. Not applicable to my country          | 0         | 0         | 0        | 0         | 0          | 0         | 0          |
|                                                       |                                          |           |           |          |           |            |           |            |
| Responding to drug information requests               |                                          |           |           |          | n =11     |            | n =40     | n= 501     |
|                                                       | 1. Yes                                   | 2(100.00) | 68(86.08) | 9(75.00) | 10(90.91) | 324(90.76) | 35(87.50) | 448(89.42) |
|                                                       | 2. No                                    | 0         | 5(6.33)   | 2(16.67) | 1(9.09)   | 21(5.88)   | 4(10.00)  | 33(6.59)   |
|                                                       | 3. Not applicable to my practice setting | 0         | 6(7.59)   | 1(8.33)  | 0         | 12(3.36)   | 1(2.50)   | 20(3.99)   |
|                                                       | 4. Not applicable to my country          | 0         | 0         | 0        | 0         | 0          | 0         | 0          |
|                                                       |                                          |           |           |          |           |            |           |            |
| Performing medication reviews                         |                                          |           | n =78     |          | n =10     | n =355     |           | n=498      |
|                                                       | 1. Yes                                   | 1(50.00)  | 58(74.36) | 7(58.77) | 8(80.00)  | 290(81.69) | 27(65.85) | 391(78.51) |
|                                                       | 2. No                                    | 1(50.00)  | 12(15.38) | 3(25.00) | 2(20.00)  | 46(12.96)  | 10(24.39) | 74(14.86)  |
|                                                       | 3. Not applicable to my practice setting | 0         | 7(8.97)   | 2(16.67) | 0         | 19(5.35)   | 4(9.76)   | 32(6.43)   |
|                                                       | 4. Not applicable to my country          | 0         | 1(1.28)   | 0        | 0         | 0          | 0         | 1(0.20)    |
|                                                       |                                          |           |           |          |           |            |           |            |
|                                                       |                                          |           |           |          |           |            |           |            |
